# Supplementary material for: Deep insights into the viscosity of deep eutectic solvents by an XGBoost-based model plus SHapley Additive exPlanation
Source: Royal Society of Chemistry journal article supplement (doi:10.1039/d2cp03423a), 2022-01-01
Supplement: d2cp03423a1.pdf [file d2cp03423a1.pdf]

## Supporting Information

### Deep insights into the viscosity of Deep Eutectic Solvents by XGBoost-based model plus SHapley Additive exPlanation

Dingyi Shi<sup>‡,a</sup>, Fengyi Zhou<sup>‡,b</sup>, Wenbo Mu<sup>c,d</sup>, Cheng Linge,<sup>\*</sup> Tiancheng Mub, Gangqiang Yud,<sup>\*</sup> Ruiqi Lia,<sup>\*</sup>

*a* College of Information Science and Technology, Beijing University of Chemical Technology, Beijing 100029, China. Email: [lir@buct.edu.cn](mailto:lir@buct.edu.cn)

*b* Department of Chemistry, Renmin University of China, Beijing 100872, China. [tcmu@ruc.edu.cn](mailto:tcmu@ruc.edu.cn)

*c* Department of Computer Science and Engineering, The Ohio State University, Columbus, OH, USA. [mu.176@buckeyemail.osu.edu](mailto:mu.176@buckeyemail.osu.edu)

*d* Faculty of Environment and Life, Beijing University of Technology, 100 Ping Le Yuan, Chaoyang District, Beijing 100124, China, Email: [yugq@bjut.edu.cn](mailto:yugq@bjut.edu.cn)

*e* China Overseas International Center, Advanced Micro Devices, Inc. (AMD), Beijing 100101, China. Email: [lingc@amd.com](mailto:lingc@amd.com)

**Table S1.** Summary of the reported laboratory-measured viscosity for diverse deep eutectic solvents in the literature

| DES    | Composition                                  | Ratio | Temperature | Viscosity       | Ref  |
|--------|----------------------------------------------|-------|-------------|-----------------|------|
| DES 1  | ChCl:Ethylene glycol                         | 1:2   | 20-80       | 4.3-60.9        | 1    |
| DES 2  | ChCl:Glycerol                                | 1:2   | 10-90       | 11.4031-1003.94 | 2, 3 |
| DES 3  | ChCl:1,2-Propanediol                         | 1:2   | 25-65       | 22.37-122.3028  | 2    |
| DES 4  | ChCl:Malonic acid                            | 1:1   | 20-75       | 10.14-2016      | 4    |
| DES 5  | ChCl:Glutaric acid                           | 1:1   | 20-80       | 9.323-2968      | 2, 4 |
| DES 6  | ChCl:Urea                                    | 1:2   | 20-80       | 13.6-1685.8     | 1    |
| DES 7  | Tetramethylammonium chloride:Ethylene glycol | 1:3   | 25-65       | 8.3058-26.12    | 2    |
| DES 8  | Tetraethylammonium chloride:Ethylene glycol  | 1:2   | 25-65       | 13.153-50.426   | 2    |
| DES 9  | Tetrabutylammonium chloride:Ethylene glycol  | 1:2   | 25-65       | 12.499-61.159   | 2    |
| DES10  | [BMIM][PF <sub>6</sub> ]:N-Methylacetamide   | 1:2   | 25-65       | 5.396-17.306    | 2    |
| DES 11 | [HMIM][PF <sub>6</sub> ]:N-Methylacetamide   | 1:2   | 25-65       | 6.4785-23.456   | 2    |

|        |                                                               |        |       |                  |   |
|--------|---------------------------------------------------------------|--------|-------|------------------|---|
| DES 12 | [OMIM][PF <sub>6</sub> ]:N-Methylacetamide                    | 1:2    | 25-65 | 8.2708-35.488    | 2 |
| DES 13 | Tetramethylammonium acetate:Ethylene glycol                   | 1:2    | 25-65 | 11.43-42.437     | 2 |
| DES 14 | Tetraethylammonium bromide:Ethylene glycol                    | 1:2    | 25-65 | 8.5566-28.84     | 2 |
| DES 15 | [BMIM][CF <sub>3</sub> SO <sub>3</sub> ]:N-Methylacetamide    | 1:2    | 25-65 | 5.1486-16.332    | 2 |
| DES 16 | [BMIM][Ac]:N-Methylacetamide                                  | 1:2    | 25-65 | 8.5325-36.361    | 2 |
| DES 17 | Phenyltrimethylammonium chloride:Ethylene glycol              | 1:2    | 25-65 | 12.151-53.292    | 2 |
| DES 18 | Benzyltrimethylammonium chloride:Ethylene glycol              | 1:2    | 25-65 | 19.568-106.31    | 2 |
| DES 19 | Allyltrimethylammonium chloride:Ethylene glycol               | 1:2    | 25-65 | 3.6863-11.319    | 2 |
| DES 20 | ZnCl <sub>2</sub> :Ethylene glycol                            | 1:2    | 25-65 | 34.206-274.75    | 2 |
| DES 21 | ZnCl <sub>2</sub> :Acetamide                                  | 1:3    | 25-65 | 36.519-602.51    | 2 |
| DES 22 | FeCl <sub>3</sub> ·6H <sub>2</sub> O:Ethylene glycol          | 2:1    | 25-65 | 3.85743-28.07838 | 2 |
| DES 23 | Lithium bis(trifluoromethanesulphonyl)imide:N-Methylacetamide | 1:4    | 25-65 | 17.687-80.548    | H |
| DES 24 | Lithium bis(trifluoromethanesulphonyl)imide:Ethylene glycol   | 1:2    | 25-65 | 53.258-372.35    | 2 |
| DES 25 | ChCl:Ethylene glycol                                          | 1:2.00 | 20-60 | 15.31-60.00      | 5 |
| DES 26 | ChCl:Ethylene glycol                                          | 1:2.99 | 20-60 | 10.47-37.35      | 5 |
| DES 27 | ChCl:Ethylene glycol                                          | 1:3.99 | 20-60 | 9.01-31.80       | 5 |
| DES28  | ChCl:Ethylene glycol                                          | 1:4.99 | 20-60 | 7.50-28.49       | 5 |
| DES29  | ChCl:Ethylene glycol                                          | 1:1.59 | 20-60 | 6.91-25.56       | 5 |
| DES30  | ChCl:1,2-Propanediol                                          | 1:2.99 | 20-60 | 17.11-94.05      | 5 |
| DES31  | ChCl:1,2-Propanediol                                          | 1:4.00 | 20-60 | 14.43-80.19      | 5 |
| DES32  | ChCl:1,2-Propanediol                                          | 1:4.97 | 20-60 | 13.04-73.34      | 5 |
| DES33  | ChCl:1,2-Propanediol                                          | 1:5.97 | 20-60 | 12.21-70.57      | 5 |
| DES34  | ChCl:1,3-Propanediol                                          | 1:3.01 | 20-60 | 16.88-69.74      | 5 |
| DES35  | ChCl:1,3-Propanediol                                          | 1:4.00 | 20-60 | 14.66-61.31      | 5 |
| DES36  | ChCl:1,3-Propanediol                                          | 1:4.97 | 20-60 | 13.25-57.14      | 5 |
| DES37  | ChCl:1,3-Propanediol                                          | 1:5.97 | 20-60 | 12.83-53.95      | 5 |
| DES38  | ChCl:1,4-Butanediol                                           | 1:3.03 | 20-60 | 23.6-112.88      | 5 |
| DES39  | ChCl:1,4-Butanediol                                           | 1:3    | 30-70 | 15.7-60.64       | 6 |
| DES40  | ChCl:1,4-Butanediol                                           | 1:3.99 | 20-60 | 20.75-99.69      | 5 |

---

|       |                                                      |        |             |                |        |
|-------|------------------------------------------------------|--------|-------------|----------------|--------|
|       |                                                      | 89     |             |                |        |
| DES41 | ChCl:1,4-Butanediol                                  | 1:5.00 | 20-60       | 19.64-93.69    | 5      |
| DES42 | ChCl:1,4-Butanediol                                  | 1:6.01 | 20-60       | 18.98-91.44    | 5      |
| DES43 | ChCl:1,4-Butanediol                                  | 1:4    | 30-70       | 14-54.75       | 7      |
| DES44 | ChCl:2,3-Butanediol                                  | 1:4    | 30-70       | 11.89-71.79    | 7      |
| DES45 | ChCl:2,3-Butanediol                                  | 1:3    | 30-70       | 14.34-84.88    | 7      |
| DES46 | ChCl:1,3-Propanediol                                 | 1:4    | 30-70       | 10.26-34.43    | 7      |
| DES47 | ChCl:1,3-Propanediol                                 | 1:3    | 30-70       | 11.85-40.05    | 7      |
| DES48 | ChCl:Phenol                                          | 1:2    | 20-45       | 34.34-120.77   | 8      |
| DES49 | ChCl:Phenol                                          | 1:3    | 20-45       | 19.14-57.84    | 8      |
| DES50 | ChCl:Phenol                                          | 1:4    | 20-45       | 14.00-40.23    | 8      |
| DES51 | ChCl:Phenol                                          | 1:5    | 20-45       | 11.26-31.96    | 8      |
| DES52 | ChCl:Phenol                                          | 1:6    | 20-45       | 9.46-27.03     | 8      |
| DES53 | ChCl:O-cresol                                        | 1:2    | 25          | 207.41         | 8      |
| DES54 | ChCl:O-cresol                                        | 1:3    | 25          | 77.65          | 8      |
| DES55 | ChCl:O-cresol                                        | 1:3.91 | 25          | 46.95          | 8      |
| DES56 | ChCl:O-cresol                                        | 1:5    | 25          | 34.90          | 8      |
| DES57 | ChCl:O-cresol                                        | 1:6    | 25          | 27.82          | 8      |
| DES58 | Betaine:Lactic acid                                  | 1:2    | 20.21-69.66 | 70-1210        | 6      |
| DES59 | Histidine:Lactic acid                                | 1:9    | 20.21-69.66 | 90-2130        | 6      |
| DES60 | Betaine:DL-Malic Acid                                | 2:1    | 20.21-69.66 | 680-27310      | 6      |
| DES61 | Ethylamine hydrochloride:Urea                        | 1:0.5  | 40-80       | 34.8-97.8      | 9      |
| DES62 | Ethylamine hydrochloride:Urea                        | 1:1    | 40-80       | 34.8-197.7     | 9      |
| DES63 | Ethylamine hydrochloride:Urea                        | 1:2    | 40-80       | 28.7-105.5     | 9      |
| DES64 | Betaine:Levulinic acid                               | 1:7    | 25          | 117.7          | 10     |
| DES65 | ChCl:Levulinic acid                                  | 1:2    | 25-75       | 7.212-320.6    | 4, 11  |
| DES66 | ChCl:Glucose                                         | 1:1    | 50-100      | 216.83-34400   | 12, 13 |
| DES67 | ChCl:Fructose                                        | 1:1    | 50-100      | 199.59-5586.90 | 12     |
| DES68 | ChCl:Xylose                                          | 1:1    | 45-100      | 146.28-5999.90 | 12     |
| DES69 | ChCl : Mannose                                       | 1:1    | 60-100      | 356.01-6619.40 | 12     |
| DES70 | Allyltriphenylphosphonium bromide:Diethylene glycol  | 1:4    | 20-70       | 17.139-213.18  | 14     |
| DES71 | Allyltriphenylphosphonium bromide:Diethylene glycol  | 1:10   | 20-70       | 8.9700-70.916  | 14     |
| DES72 | Allyltriphenylphosphonium bromide:Diethylene glycol  | 1:16   | 20-70       | 7.870-57.19    | 14     |
| DES73 | Allyltriphenylphosphonium bromide:Triethylene glycol | 1:4    | 20-70       | 19.402-233.75  | 14     |
| DES74 | Allyltriphenylphosphonium bromide:Triethylene glycol | 1:10   | 20-70       | 11.402-95.287  | 14     |

---

|         |                                                       |        |        |                  |    |
|---------|-------------------------------------------------------|--------|--------|------------------|----|
| DES75   | Allyltriphenylphosphonium bromide:Triethylene glycol  | 1:16   | 20-70  | 9.8905-76.6310   | 14 |
| DES76   | ChCl:Triethylene glycol                               | 1:3    | 25-85  | 9.0-68.0         | 15 |
| DES77   | ChCl:Triethylene glycol                               | 1:4    | 25-85  | 8.1-61.9         | 15 |
| DES78   | ChCl:Triethylene glycol                               | 1:5    | 25-85  | 7.5-53.0         | 15 |
| DES79   | ChCl:Triethylene glycol                               | 1:6    | 25-85  | 6.5-44.9         | 15 |
| DES80   | N,N-diethylethanolammonium chloride:Glycerol          | 1:2    | 25-70  | 42.5755-513.0930 | 16 |
| DES81   | N,N-diethylethanolammonium chloride : Ethylene glycol | 1:2    | 25-70  | 9.9868-50.4466   | 16 |
| DES82   | ChCl:Imidazole                                        | 3:7    | 20-130 | 6.2-810.0        | 17 |
| DES83   | Tetrabutylammonium bromide:Imidazole                  | 3:7    | 60-130 | 4.0-22.5         | 17 |
| DES84   | ChCl:Xylitol                                          | 1:1    | 30-70  | 250-5230         | 13 |
| DES85   | ChCl:D-Sorbitol                                       | 1:1    | 30-70  | 480-12730        | 13 |
| DES86   | ChCl:Oxalic acid                                      | 1:1    | 20-75  | 10-8953          | 4  |
| DES87   | ChCl:Glycolic acid                                    | 1:1    | 20-80  | 7.845-779.4      | 4  |
| DES88   | ChCl:Levulinic acid                                   | 1:3    | 20-60  | 20.21-134.23     | 18 |
| DES89   | Acetylcholine chloride:Levulinic acid                 | 1:3    | 20-60  | 21.47-164.52     | 18 |
| DES90   | Tetraethylammonium chloride:Levulinic acid            | 1:3    | 20-60  | 18.71-130.07     | 18 |
| DES91   | Tetraethylammonium bromide:Levulinic acid             | 1:3    | 20-60  | 19.74-148.95     | 18 |
| DES92   | Tetrabutylammonium chloride:Levulinic acid            | 1:3    | 20-60  | 17.47-121.68     | 18 |
| DES93   | Tetrabutylammonium bromide:Levulinic_acid             | 1:3    | 20-60  | 33.85-376.50     | 18 |
| DES94   | Trimethylamine hydrochloride:Levulinic acid           | 1:3    | 20-60  | 12.70-74.02      | 18 |
| DES 95  | Acetylcholine chloride:1,2,4-Triazole                 | 1:1    | 30-90  | 8.37-304.69      | 19 |
| DES 96  | Acetylcholine chloride:Imidazole                      | 1:1.5  | 30-90  | 11.69-233.69     | 19 |
| DES 97  | Acetylcholine chloride:Imidazole                      | 1:2    | 30-90  | 4.17-103.33      | 19 |
| DES 98  | Acetylcholine chloride:Imidazole                      | 1:3    | 30-90  | 17.68-335.98     | 19 |
| DES 99  | Benzyltripropylammonium Chloride:Phenol               | 1:3    | 20-70  | 20.4-638.4       | 20 |
| DES 100 | Benzyltripropylammonium Chloride:Ethylene glycol      | 1:3    | 20-70  | 22.2-327.9       | 20 |
| DES 101 | Benzyltripropylammonium Chloride:Lactic acid          | 1:3    | 30-70  | 81.3-2276.7      | 20 |
| DES 102 | Benzyltripropylammonium Chloride:Glycerol             | 1:3    | 30-70  | 97-1890.5        | 20 |
| DES 103 | Methyltriphenylphosphonium bromide : Glycerol         | 1:1.75 | 45-95  | 36.9-887.1       | 21 |
| DES 104 | Methyltriphenylphosphonium bromide:Ethylene glycol    | 1:4    | 5-75   | 1.8-345          | 21 |
| DES10   | Methyltriphenylphosphonium bromide:Ethylene glycol    | 1:8    | 5-85   | 0.9-657.7        | 21 |

|       |                                    |     |       |            |    |
|-------|------------------------------------|-----|-------|------------|----|
| 5     | m bromide:2,2,2-Trifluoroacetamide |     |       |            |    |
| DES10 | Methyltriphenylphosphoni           | 1:5 | 55-95 | 38.7-553.7 | 21 |
| 6     | m bromide:Glycerol                 |     |       |            |    |
| DES10 | Methyltriphenylphosphoni           | 1:3 | 55-95 | 35.9-201.9 | 21 |
| 7     | m bromide:Ethylene glycol          |     |       |            |    |

**Table S2.** The MSE and R2 of different models in training set and test set

| Model                     | Representation             | Data set     | MSE    | R <sup>2</sup> |
|---------------------------|----------------------------|--------------|--------|----------------|
| Support Vector Regression | BP                         | Training set | 1.9014 | 0.2765         |
|                           |                            | Test set     | 2.6443 | 0.1328         |
|                           | BP _ W <sub>H2O</sub>      | Training set | 1.8144 | 0.3093         |
|                           |                            | Test set     | 2.6169 | 0.1418         |
|                           | BP _ MF                    | Training set | 0.5222 | 0.8012         |
|                           |                            | Test set     | 0.6595 | 0.7837         |
|                           | BP _ W <sub>H2O</sub> _ MF | Training set | 0.0877 | 0.9666         |
|                           |                            | Test set     | 0.2121 | 0.9304         |
| Random Forest             | BP                         | Training set | 1.6629 | 0.3670         |
|                           |                            | Test set     | 2.4072 | 0.2105         |
|                           | BP _ W <sub>H2O</sub>      | Training set | 0.2712 | 0.8968         |
|                           |                            | Test set     | 0.6854 | 0.7752         |
|                           | BP _ MF                    | Training set | 0.4999 | 0.8097         |
|                           |                            | Test set     | 0.6885 | 0.7742         |
|                           | BP _ W <sub>H2O</sub> _ MF | Training set | 0.0191 | 0.9927         |
|                           |                            | Test set     | 0.1199 | 0.9607         |
| Neural Network            | BP                         | Training set | 2.2736 | 0.1346         |
|                           |                            | Test set     | 2.9722 | 0.0253         |
|                           | BP _ W <sub>H2O</sub>      | Training set | 1.1609 | 0.5581         |
|                           |                            | Test set     | 2.2798 | 0.2523         |
|                           | BP _ MF                    | Training set | 0.3426 | 0.8696         |
|                           |                            | Test set     | 0.6997 | 0.7705         |
|                           | BP _ W <sub>H2O</sub> _ MF | Training set | 0.0312 | 0.9881         |
|                           |                            | Test set     | 0.0658 | 0.9784         |
| Extreme Gradient boosting | BP                         | Training set | 1.6868 | 0.3579         |
|                           |                            | Test set     | 2.3750 | 0.2211         |
|                           | BP _ W <sub>H2O</sub>      | Training set | 0.2566 | 0.9023         |
|                           |                            | Test set     | 0.5547 | 0.8181         |
|                           | BP _ MF                    | Training set | 0.3487 | 0.8673         |
|                           |                            | Test set     | 0.5666 | 0.8142         |
|                           | BP _ W <sub>H2O</sub> _ MF | Training set | 0.0002 | 0.9999         |
|                           |                            | Test set     | 0.0422 | 0.9861         |

**Table S3.** The ranges of the grid-search for each algorithm in training the models

| Algorithm                 | Hyperparameter | Range                       |
|---------------------------|----------------|-----------------------------|
| Support Vector Regression | C              | 0.1,0.2,0.3, 1,2,3,10,20    |
|                           | gamma          | 1, 0.1, 0.01,0.001          |
| Random Forest             | n_estimators   | 5,10,20,50,70,100           |
|                           | max_depth      | 3,5,7,9,10,20               |
|                           | max_features   | 0.6,0.7,1                   |
| Extreme Gradient boosting | n_estimators   | 5, 10, 20, 50, 70, 100, 200 |
|                           | max_depth      | 5, 6, 7, 8                  |
|                           | max_delta_step | 1, 3, 5, 7                  |

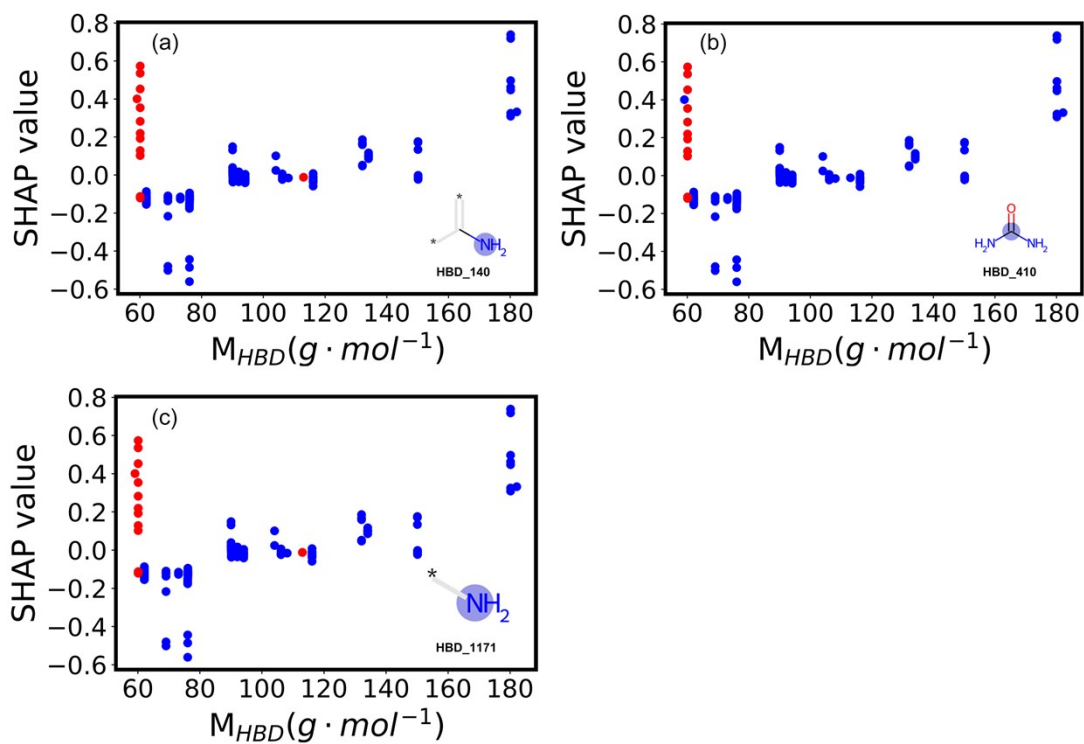

Fig. S1 The relationship between SHAP value and the NH<sub>2</sub> group related substructure for DESs. DESs with (a) HBD\_140, (b) HBD\_410, and (c) HBD\_1771 are highlighted in red.

## Reference :

1. Mirza, N. R.; Nicholas, N. J.; Wu, Y.; Smith, K. H.; Kentish, S. E.; Stevens, G. W., Viscosities and Carbon Dioxide Solubilities of Guanidine Carbonate and Malic Acid-Based Eutectic Solvents. *J. Chem. Eng. Data* **2017**, *62* (1), 348-354, DOI: 10.1021/acs.jced.6b00680.
2. Wang, Y.; Chen, W.; Zhao, Q.; Jin, G.; Xue, Z.; Wang, Y.; Mu, T., Ionicity of deep eutectic solvents by Walden plot and pulsed field gradient nuclear magnetic resonance (PFG-NMR). *Phys. Chem. Chem. Phys.* **2020**, *22* (44), 25760-25768, DOI: 10.1039/D0CP01431A.
3. Yadav, A.; Trivedi, S.; Rai, R.; Pandey, S., Densities and dynamic viscosities of (choline chloride+glycerol) deep eutectic solvent and its aqueous mixtures in the temperature range (283.15–363.15)K. *Fluid Phase Equilib.* **2014**, *367*, 135-142, DOI: 10.1016/j.fluid.2014.01.028.
4. Florindo, C.; Oliveira, F. S.; Rebelo, L. P. N.; Fernandes, A. M.; Marrucho, I. M., Insights into the Synthesis and Properties of Deep Eutectic Solvents Based on Cholinium Chloride and Carboxylic Acids. *ACS Sustain. Chem. Eng.* **2014**, *2* (10), 2416-2425, DOI: 10.1021/sc500439w.
5. Gajardo-Parra, N. F.; Cotroneo-Figueroa, V. P.; Aravena, P.; Vesovic, V.; Canales, R. I., Viscosity of Choline Chloride-Based Deep Eutectic Solvents: Experiments and Modeling. *J. Chem. Eng. Data* **2020**, *65* (11), 5581-5592, DOI: 10.1021/acs.jced.0c00715.
6. Castro, V. I. B.; Mano, F.; Reis, R. L.; Paiva, A.; Duarte, A. R. C., Synthesis and Physical and Thermodynamic Properties of Lactic Acid and Malic Acid-Based Natural Deep Eutectic Solvents. *J. Chem. Eng. Data* **2018**, *63* (7), 2548-2556, DOI: 10.1021/acs.jced.7b01037.
7. Deng, X.; Duan, X.; Gong, L.; Deng, D., Ammonia Solubility, Density, and Viscosity of Choline Chloride–Dihydric Alcohol Deep Eutectic Solvents. *J. Chem. Eng. Data* **2020**, *65* (10), 4845-4854, DOI: 10.1021/acs.jced.0c00386.
8. Guo, W.; Hou, Y.; Ren, S.; Tian, S.; Wu, W., Formation of Deep Eutectic Solvents by Phenols and Choline Chloride and Their Physical Properties. *J. Chem. Eng. Data* **2013**, *58* (4), 866-872, DOI: 10.1021/je300997v.
9. Zhang, J.-Y.; Kong, L.-Y.; Huang, K., NH<sub>3</sub> Solubilities and Physical Properties of Ethylamine Hydrochloride Plus Urea Deep Eutectic Solvents. *J. Chem. Eng. Data* **2019**, *64* (9), 3821-3830, DOI: 10.1021/acs.jced.9b00246.
10. Hatab, F. A.; Darwish, A. S.; Lemaoui, T.; Warrag, S. E. E.; Benguerba, Y.; Kroon, M. C.; AlNashef, I. M., Extraction of Thiophene, Pyridine, and Toluene from n-Decane as a Diesel Model Using Betaine-Based Natural Deep Eutectic Solvents. *J. Chem. Eng. Data* **2020**, *65* (11), 5443-5457, DOI: 10.1021/acs.jced.0c00579.
11. Sas, O. G.; Fidalgo, R.; Domínguez, I.; Macedo, E. A.; González, B., Physical Properties of the Pure Deep Eutectic Solvent, [ChCl]:[Lev] (1:2) DES, and Its Binary Mixtures with Alcohols. *J. Chem. Eng. Data* **2016**, *61* (12), 4191-4202, DOI: 10.1021/acs.jced.6b00563.
12. Silva, L. P.; Fernandez, L.; Conceição, J. H. F.; Martins, M. A. R.; Sosa, A.; Ortega, J.; Pinho, S. P.; Coutinho, J. A. P., Design and Characterization of Sugar-Based Deep Eutectic Solvents Using Conductor-like Screening Model for Real Solvents. *ACS Sustain. Chem. Eng.* **2018**, *6* (8), 10724-10734, DOI: 10.1021/acssuschemeng.8b02042.
13. Maugeri, Z.; Domínguez de María, P., Novel choline-chloride-based deep-eutectic-solvents with renewable hydrogen bond donors: levulinic acid and sugar-based polyols. *RSC Advances* **2012**, *2* (2), 421-425, DOI: 10.1039/C1RA00630D.
14. Ghaedi, H.; Ayoub, M.; Sufian, S.; Shariff, A. M.; Lal, B., The study on temperature dependence of viscosity and surface tension of several Phosphonium-based deep eutectic

- solvents. *J. Mol. Liq.* **2017**, *241*, 500-510, DOI: [10.1016/j.molliq.2017.06.024](https://doi.org/10.1016/j.molliq.2017.06.024).
15. Mjalli, F. S.; Naser, J., Viscosity model for choline chloride-based deep eutectic solvents. *Asia-Pac J. Chem. Eng.* **2015**, *10* (2), 273-281, DOI: [10.1002/apj.1873](https://doi.org/10.1002/apj.1873).
16. Siongco, K. R.; Leron, R. B.; Li, M.-H., Densities, refractive indices, and viscosities of N,N-diethylethanol ammonium chloride–glycerol or –ethylene glycol deep eutectic solvents and their aqueous solutions. *The Journal of Chemical Thermodynamics* **2013**, *65*, 65-72, DOI: [10.1016/j.jct.2013.05.041](https://doi.org/10.1016/j.jct.2013.05.041).
17. Hou, Y.; Gu, Y.; Zhang, S.; Yang, F.; Ding, H.; Shan, Y., Novel binary eutectic mixtures based on imidazole. *J. Mol. Liq.* **2008**, *143* (2), 154-159, DOI: [10.1016/j.molliq.2008.07.009](https://doi.org/10.1016/j.molliq.2008.07.009).
18. Li, G.; Jiang, Y.; Liu, X.; Deng, D., New levulinic acid-based deep eutectic solvents: Synthesis and physicochemical property determination. *J. Mol. Liq.* **2016**, *222*, 201-207, DOI: [10.1016/j.molliq.2016.07.039](https://doi.org/10.1016/j.molliq.2016.07.039).
19. Deng, D.; Liu, X.; Gao, B., Physicochemical Properties and Investigation of Azole-Based Deep Eutectic Solvents as Efficient and Reversible SO<sub>2</sub> Absorbents. *Industrial & Engineering Chemistry Research* **2017**, *56* (46), 13850-13856, DOI: [10.1021/acs.iecr.7b02478](https://doi.org/10.1021/acs.iecr.7b02478).
20. Basaiahgari, A.; Panda, S.; Gardas, R. L., Acoustic, volumetric, transport, optical and rheological properties of Benzyltripropylammonium based Deep Eutectic Solvents. *Fluid Phase Equilib.* **2017**, *448*, 41-49, DOI: [10.1016/j.fluid.2017.03.011](https://doi.org/10.1016/j.fluid.2017.03.011).
21. Kareem, M. A.; Mjalli, F. S.; Hashim, M. A.; AlNashef, I. M., Phosphonium-Based Ionic Liquids Analogues and Their Physical Properties. *J. Chem. Eng. Data* **2010**, *55* (11), 4632-4637, DOI: [10.1021/je100104v](https://doi.org/10.1021/je100104v).
